# Supplementary material
Source: PubMed Central journal article supplement (PMC2806573)
Supplement: supp_193_3_185__1.pdf [file supp_193_3_185__1.pdf]

## Data supplement

**Table DS1** Summary of confounding variables according to IQ score tertiles

| Variable                                              | Total IQ tertiles, n (%) |                 |             |
|-------------------------------------------------------|--------------------------|-----------------|-------------|
|                                                       | Low IQ                   | Intermediate IQ | High IQ     |
| Gender                                                |                          |                 |             |
| Male                                                  | 1185 (35.2)              | 1061 (31.5)     | 1119 (33.3) |
| Female                                                | 1163 (34.3)              | 1161 (34.3)     | 1062 (31.4) |
| Low birth weight (<2500 g) <sup>a</sup>               |                          |                 |             |
| No                                                    | 2071 (34.1)              | 1998 (32.9)     | 2012 (33.1) |
| Yes                                                   | 126 (42.1)               | 110 (36.8)      | 63 (21.1)   |
| Housing tenure <sup>b</sup>                           |                          |                 |             |
| Mortgaged or owned                                    | 1632 (31.1)              | 1776 (33.9)     | 1837 (35)   |
| Privately rented                                      | 206 (39.1)               | 168 (31.9)      | 153 (29)    |
| Council                                               | 298 (60.2)               | 135 (27.3)      | 62 (12.5)   |
| Mother's highest educational achievement <sup>c</sup> |                          |                 |             |
| < O-level                                             | 727 (54.1)               | 414 (30.8)      | 202 (15)    |
| O-level                                               | 806 (36.9)               | 786 (36.0)      | 590 (27)    |
| > O-level                                             | 564 (20.8)               | 875 (32.3)      | 1273 (46.9) |
| Social class <sup>d</sup>                             |                          |                 |             |
| Non-manual                                            | 828 (24.2)               | 1140 (33.3)     | 1456 (42.5) |
| Manual                                                | 1133 (44.6)              | 858 (33.8)      | 548 (21.6)  |
| Family history of mental health problems <sup>e</sup> |                          |                 |             |
| No                                                    | 502 (32.0)               | 525 (33.5)      | 542 (34.5)  |
| Other                                                 | 730 (30.0)               | 823 (33.8)      | 881 (36.2)  |
| Depression                                            | 556 (38.9)               | 452 (31.7)      | 420 (29.4)  |
| Schizophrenia                                         | 21 (27.3)                | 26 (33.8)       | 30 (39)     |
| Urban indicator                                       |                          |                 |             |
| Rural                                                 | 195 (26.4)               | 253 (34.3)      | 290 (39.3)  |
| Urban                                                 | 2130 (35.8)              | 1954 (32.8)     | 1874 (31.5) |
| Single-parent family                                  |                          |                 |             |
| No                                                    | 1997 (33.4)              | 1992 (33.3)     | 1995 (33.3) |
| Yes                                                   | 159 (46.6)               | 106 (31.1)      | 76 (22.3)   |
| Victim of overt bullying <sup>f</sup>                 |                          |                 |             |
| No                                                    | 1368 (32.3)              | 1399 (33.0)     | 1472 (34.7) |
| Yes                                                   | 839 (38.1)               | 720 (32.7)      | 644 (29.2)  |
| Victim of relational bullying <sup>f</sup>            |                          |                 |             |
| No                                                    | 1769 (33.5)              | 1712 (32.5)     | 1792 (34.0) |
| Yes                                                   | 378 (37)                 | 359 (35.2)      | 284 (27.8)  |
| SDQ total behavioural difficulties score <sup>g</sup> |                          |                 |             |
| No                                                    | 1452 (30.2)              | 1652 (34.3)     | 1709 (35.5) |
| Yes                                                   | 318 (46.8)               | 199 (29.3)      | 163 (24)    |

a. Recorded either from obstetrics data, from birth notification, or by ALSPAC staff.  
b. Information gained during pregnancy.  
c. Information was obtained of all qualifications of the mother during pregnancy.  
d. Family social class was derived as the lower of the mother and partner social classes using the 1991 Office of Population & Census Statistics classification.<sup>1</sup>  
e. Family history of psychiatric disorder was coded as present if the parents of the child had had depression, or if the parents or grandparents had had schizophrenia, drug or alcohol addiction, or other psychiatric problems.  
f. Bullying and Friendship Interview Schedule at 8 years of age.<sup>2</sup>  
g. The Strengths and Difficulties Questionnaire (SDQ)<sup>3</sup> was completed by the mother and used to measure behavioural and adjustment difficulties at 81 months (6.75 years). Total difficulties score was used.

## References

- Office of Population Censuses and Surveys. *Standard Occupational Classification*. TSO (The Stationery Office), 1991.
- Wolke D, Woods S, Bloomfield L, Karstadt L. The association between direct and relational bullying and behaviour. *J Child Psychol Psychiatry* 2000; **41**: 889–1002.
- Goodman R. The Strengths and Difficulties Questionnaire: a research note. *J Child Psychol Psychiatry* 1997; **38**: 581–6.
